# Supplementary material for: Vascular disruptive agent OXi4503 and anti-angiogenic agent Sunitinib combination treatment prolong survival of mice with CRC liver metastasis
Source: Springer Nature journal article supplement (doi:10.1186/s12885-016-2568-7), 2016-07-26
Supplement: MOESM1 [file 10520978]

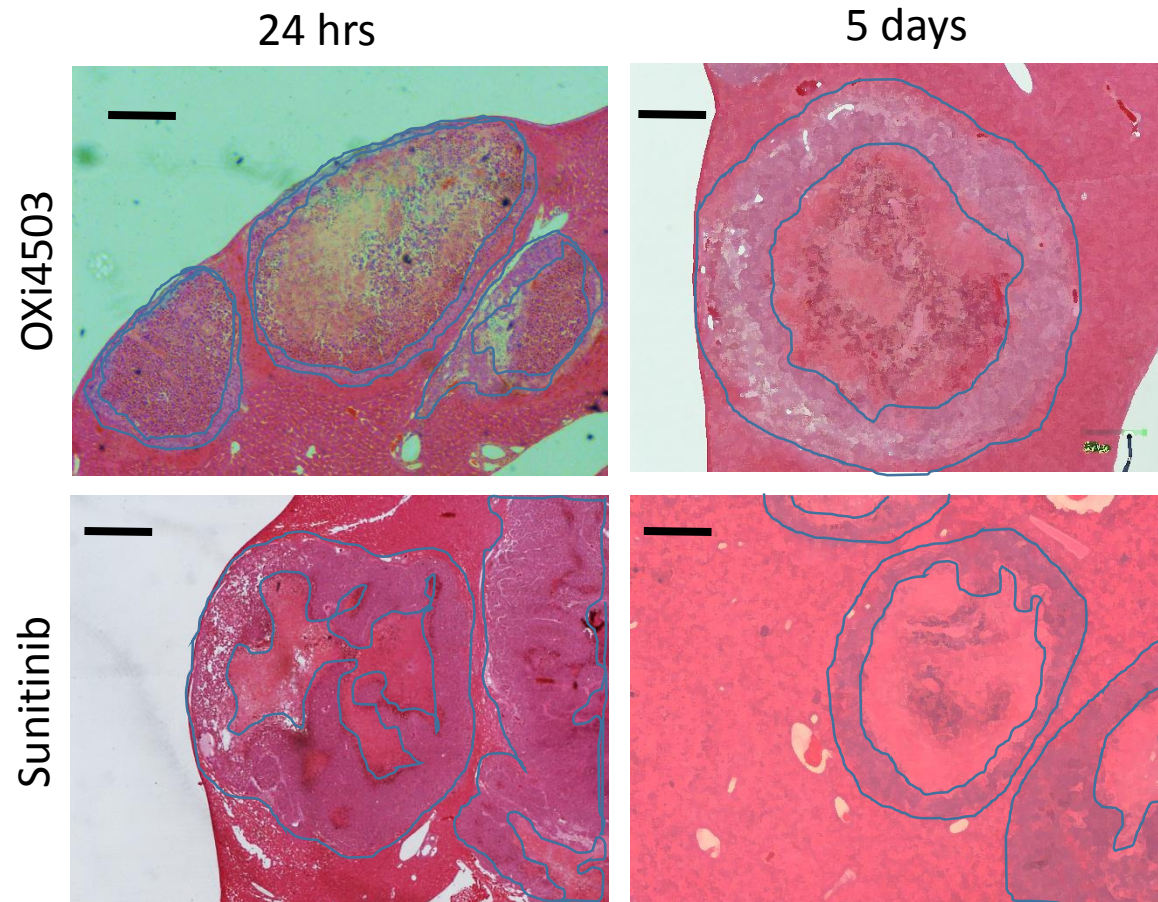

**Additional File 1: Effects of treatment on tumor.** Tumor death is evaluated with H&E staining. Live tumor areas are enclosed within double lines. A single OXi4503 treatment has an immediate effect on tumor death reaching a maximum at 24 hrs. By day five there is regrowth of the tumor into the necrotic centre. Continuous Sunitinib treatment has a gradual reducing effect on live tumor but it does not reach the levels of tumour killing seen by the OXi4503 treatment at 24 hrs.
