# Supplementary material for: Vascular disruptive agent OXi4503 and anti-angiogenic agent Sunitinib combination treatment prolong survival of mice with CRC liver metastasis
Source: Springer Nature journal article supplement (doi:10.1186/s12885-016-2568-7), 2016-07-26
Supplement: MOESM2 [file 10520978]

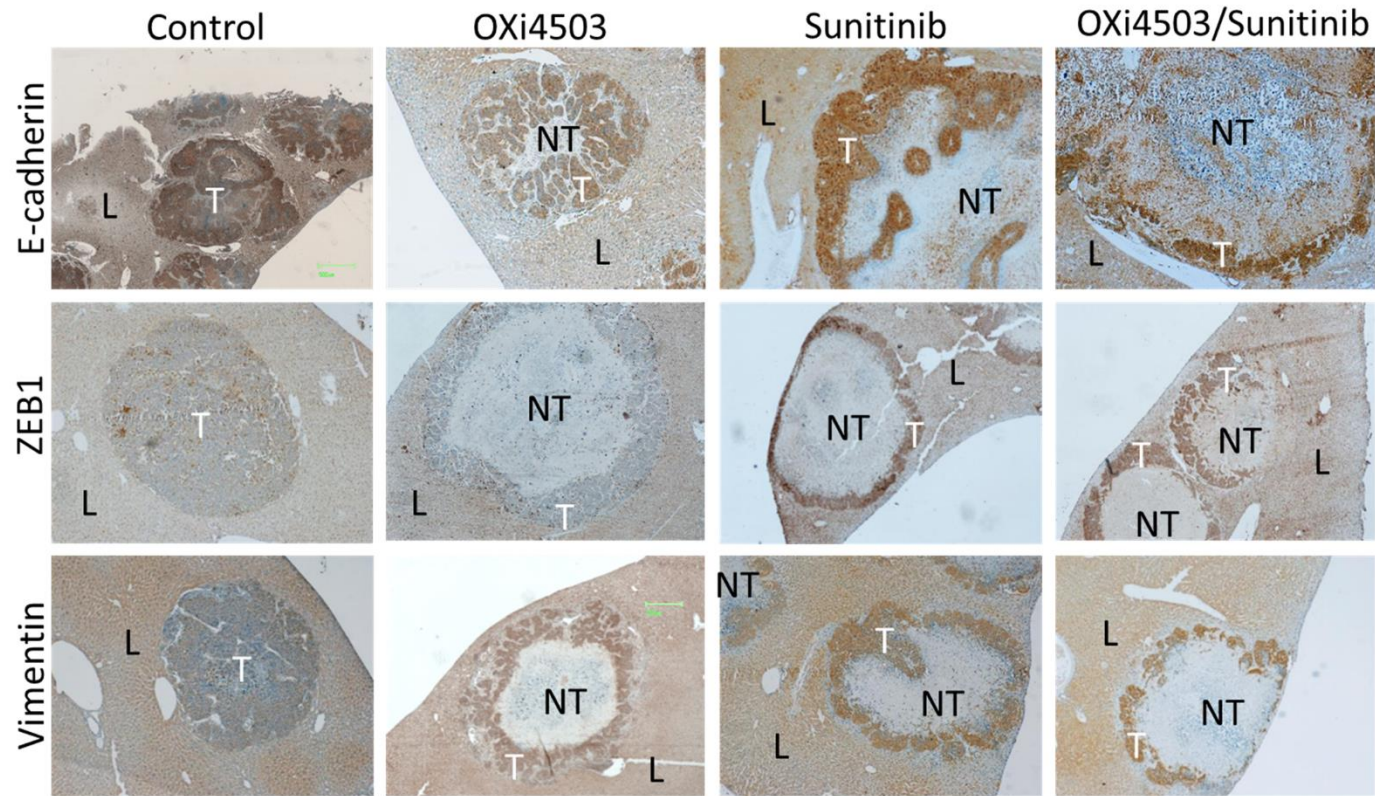

**Additional File 2: OXi4503, Sunitinib and combination treatments induce EMT in the surviving tumor cells.** Formalin-fixed control and treated tumor sections were stained with antibodies to E-cadherin, ZEB1, or Vimentin. Positive expression is detected by the brown staining. Scale bar=200 mm. L=liver, T= live tumor. NT= necrotic tumor. Images are representative for each treatment group (n≥5 animals).
